# Supplementary material
Source: Springer Nature journal article supplement (https://www.springermedizin.de/resource/supplementary/12960_2012_353_MOESM1_ESM.pdf/9569906)
Supplement: MOESM1 [file 9569906]

**Table S1. Summary of Hospital Characteristics**

| <b>Hospital</b>          | <b>No. of Beds</b>   | <b>No. of Staff</b>                                                                         | <b>No. of Theatres</b>          | <b>Training Centre</b>                                                                                                                              | <b>Geographical Location</b>                                                                                                                                                                                   |
|--------------------------|----------------------|---------------------------------------------------------------------------------------------|---------------------------------|-----------------------------------------------------------------------------------------------------------------------------------------------------|----------------------------------------------------------------------------------------------------------------------------------------------------------------------------------------------------------------|
| <b>H1<br/>(FBH)</b>      | 220<br>(+60<br>cots) | 564; 35 MOs ;<br>2 Kenyan<br>consultants;<br>25 foreign<br>consultants                      | 5; planned<br>expansion<br>to 9 | Nursing;<br>Internship centre<br>for COs & MOs;<br>train registrars                                                                                 | 47kms from Nairobi. Rural.<br>Agricultural area; highly<br>influenced by Nairobi.<br>Technical support from the<br>African Inland Mission                                                                      |
| <b>H6<br/>(FBH)</b>      | 280                  | 8 consultants;<br>8 MOs; 7<br>COs.                                                          | 3                               | Plans underway to<br>begin nursing<br>courses with<br>Catholic<br>University of East<br>Africa                                                      | Located in Nairobi's<br>Langata suburb, next to<br>expansive Kibera slums.<br>Affiliated to the Catholic<br>Church- mainly supported<br>by patients fees                                                       |
| <b>H4 [43]<br/>(FBH)</b> | 275<br>(+16<br>cots) | 3 resident<br>MOs; 4<br>consultants;<br>various local<br>and<br>international<br>volunteers | 1                               | Internship centre<br>for COs;<br>Accredited CPD<br>centre (KMPDB);<br>Training centre for<br>student physicians<br>via formal<br>collaboration with | 209 kms from Nairobi.<br>Rural. Highly agricultural.<br>Support from the United<br>Methodist Church;<br>infrastructure, personnel<br>and equipment support<br>through MOMS; various<br>local and international |

|                           |                      | KEMU;                                                                                    |   | NGOs                                                                        |                                                                                                                                                                                        |
|---------------------------|----------------------|------------------------------------------------------------------------------------------|---|-----------------------------------------------------------------------------|----------------------------------------------------------------------------------------------------------------------------------------------------------------------------------------|
| <b>H2</b><br><b>(GOK)</b> | 306<br>(+17<br>cots) | Consultants – 2<br>11; MOs – 12;<br>MO Interns –<br>7; RCOs – 21;<br>CO Interns –<br>30; |   | Internship centre<br>for COs & MOs;<br>Meru MTC located<br>next to hospital | 174kms from Nairobi.<br>Highly agricultural; location<br>of national wildlife<br>reserves. Urban centre.                                                                               |
| <b>H5</b><br><b>(GOK)</b> | 265<br>(+24<br>cots) | 5 MOs, 12<br>MO Interns, 10<br>Consultants,;<br>10 RCOs, 50<br>CO interns                | 3 | Training centre for<br>COs, Nurses,<br>MOs, BSN,                            | 39 kms from Nairobi,<br>considered its satellite<br>town; major highway<br>connecting them;<br>agriculture & industrial<br>enterprises                                                 |
| <b>H3</b><br><b>(GOK)</b> | 305<br>(+35<br>cots) |                                                                                          | 1 |                                                                             | 200kms from Nairobi.<br>Semi-arid region. Rural.<br>Location of wildlife<br>conservancies & armed<br>forces (including police)<br>training bases. Livestock<br>keeping, market farming |

Source: <http://www.ehealth.or.ke/facilities/facility.aspx?fas=13218>
